# Supplementary material for: Recapitulation of Retinal Damage in Zebrafish Larvae Infected with Zika Virus
Source: MDPI journal article supplement (doi:10.3390/cells11091457), 2022-04-26
Supplement: s1 [file s1]

**Supplementary Table S1. Zebrafish (*Danio rerio*) qPCR primers**

|                                                           |
|-----------------------------------------------------------|
| <i>Zika virus</i>                                         |
| 1086 FWD: CCG CTG CCC AAC ACA AG                          |
| 1007 probe: AGCCTACCTTGACAAGCAGTCAGACACTCAA               |
| 1162 REV: CCA CTA ACG TTC TTT TGC AGA CAT                 |
|                                                           |
| <i>Antiviral Immunity:</i>                                |
| IFNphi1(a)                                                |
| FWD: GCTTGGCCGATACAGGATAAT                                |
| Probe: TCTGGAGACACCATTTCGAAGCCG                           |
| REV: TCCACCTTTGACTTGTCCATC                                |
|                                                           |
| IFNphi2(c)                                                |
| FWD: GGCAATTCGTTGCGTTCTTAT                                |
| Probe: ACCAACAAACTGCTTCATGCGAAGG                          |
| REV: CTCTCAAGTAGACTGTAAGCTGTT                             |
|                                                           |
| IFNphi3(c)                                                |
| FWD: GAGGATCAGGTTACTGGTGTG                                |
| Probe: TCAGACACTCCAGAACATTGACGCA                          |
| REV: GCCTCTAAAGTCATCCAGTTTCT                              |
|                                                           |
| IFNphi4(d)                                                |
| FWD: CTGAGAAGAATGACAGAGCTGAA                              |
| Probe: TTTCTGACCATCTCCAGCTTCTGC                           |
| REV: AACATGAGTGTGGAAGGAGAAG                               |
|                                                           |
| <i>Inflammatory response and granulopoiesis:</i>          |
| IL-1                                                      |
| FWD: GCTGGAGATCCAAACGGATAC                                |
| Probe: CGGCAGCTCCATAAACACCTTCGA                           |
| REV: CTTCATACGCGGTGCTGATAA                                |
|                                                           |
| TNF                                                       |
| FWD: GGAGGGTGTGTTGGGATCATT                                |
| Probe: TGCTTCACGCTCCATAAGACCCAG                           |
| REV: GTCTCAGCACACTTCCATCTT                                |
|                                                           |
| IL-6                                                      |
| FWD: AGTTCAGGATGTGGACGTAAAG                               |
| Probe: ACCGGCAGAAGTGGCATCTGAT                             |
| REV: CTCTCAAACGCTCGTCTCTG                                 |
|                                                           |
| IL-8                                                      |
| FWD: AGCGCTGTCAGTGCATTA                                   |
| Probe: AAGTACTCGGACTGAAGGTGACTCCT                         |
| REV: GCGATGATCTCCTCGTTTCT                                 |
|                                                           |
| IL-34                                                     |
| FWD: TGC GTTATGAGGAGGTGTTT                                |
| Probe: ACTGCGAAACATCAGCAGACTGGT                           |
| REV: GACTCACGTAAAGCCACAAATC                               |
|                                                           |
| <i>Antimicrobial enzymes induced during inflammation:</i> |
| iNOSa                                                     |
| FWD: CCTAACAAATCTCTGTGGTGGAG                              |

|                                    |
|------------------------------------|
| Probe: ATGCATTTTCGGCACTTGCAGCA     |
| REV: GGGAAGTGTGTGTCCTCTTT          |
|                                    |
| iNOSb                              |
| FWD: CTGCTCTGTGCGACTCTTCATTC       |
| Probe: ACTGAAGAGAAGGCAGAACCTGCA    |
| REV: CCATTTCAGCTCCACCAATA          |
|                                    |
| NOX1 (p67 <sup>phox</sup> )        |
| FWD: GCTCCACTTCAGCCTCAAATA         |
| Probe: AAGTTCCAGAAGTGCTACGGGTGC    |
| REV: AGTCTCTGGAACAACTCATACAG       |
|                                    |
| NOX2 (gp91 <sup>phox</sup> )       |
| FWD: TTAGAGGGTGAAGACGGAGAT         |
| Probe: CCCTGCTCCAAGACTCCAGTGAATT   |
| REV: GTCGTAGAATTGGAGGGAAAGG        |
|                                    |
| <i>Endogenous controls:</i>        |
| EF-1a                              |
| FWD: GGCAAGAAGCTTGAAGACAAC         |
| Probe: CCATTGTTGAGATGGTCCCTGGCA    |
| REV: CAAGAGGAGGGTAGGTAGAGAA        |
|                                    |
| GAPDH                              |
| FWD: GACGCTGGTGCTGGTATT            |
| Probe: TCTCAACGATCACTTTGTCAAGCTGGT |
| Rev: GTGCCATCAGGTCACATACA          |
